# Supplementary material
Source: PubMed Central journal article supplement (PMC4528754)
Supplement: supp_pp.15.00535_PP2015-00535DR1_Supplemental_Material_2tbls.pdf [file supp_pp.15.00535_PP2015-00535DR1_Supplemental_Material_2tbls.pdf]

**Supplemental Table S1.** Sequence similarity of B73 and teosinte *ZCN7* and *ZCN8* genes. The sequences were aligned with ClustalW2 (<http://www.ebi.ac.uk/Tools/msa/clustalw2/>; Larkin et al., 2007) followed by the calculation of the nucleotide identity and amino acid similarity using the SIAS software (<http://imed.med.ucm.es/Tools/sias.html>) with the BLOSSUM62 matrix. For sequence identity estimation the gaps obtained after the alignment were not considered and the percentage was referred to the shortest sequence. The cDNA includes the predicted coding region plus the 5'- and 3'-end untranslated regions amplified in RT-PCR; the gene region includes the cDNA plus the introns and the 5'- and 3'-end sequences that were not detected in RT-PCR with the selected primer combinations.

**Nucleotide sequence identity in the cDNA**

|                      |                 |                      |                 |                      |
|----------------------|-----------------|----------------------|-----------------|----------------------|
| <i>ZCN7</i> B73      | 100%            |                      |                 |                      |
| <i>ZCN7</i> teosinte | 99.5%           | 100%                 |                 |                      |
| <i>ZCN8</i> B73      | 92.2%           | 92.7%                | 100%            |                      |
| <i>ZCN8</i> teosinte | 91.2%           | 91.7%                | 99.5%           | 100%                 |
|                      | <i>ZCN7</i> B73 | <i>ZCN7</i> teosinte | <i>ZCN8</i> B73 | <i>ZCN8</i> teosinte |

**Nucleotide sequence identity in the gene**

|                      |                 |                      |                 |                      |
|----------------------|-----------------|----------------------|-----------------|----------------------|
| <i>ZCN7</i> B73      | 100%            |                      |                 |                      |
| <i>ZCN7</i> teosinte | 99.1%           | 100%                 |                 |                      |
| <i>ZCN8</i> B73      | 88.9%           | 87.8%                | 100%            |                      |
| <i>ZCN8</i> teosinte | 87.0%           | 87.2%                | 99.1%           | 100%                 |
|                      | <i>ZCN7</i> B73 | <i>ZCN7</i> teosinte | <i>ZCN8</i> B73 | <i>ZCN8</i> teosinte |

**Amino acid sequence identity**

|                      |                 |                      |                 |                      |
|----------------------|-----------------|----------------------|-----------------|----------------------|
| <i>ZCN7</i> B73      | 100%            |                      |                 |                      |
| <i>ZCN7</i> teosinte | 98.9%           | 100%                 |                 |                      |
| <i>ZCN8</i> B73      | 90.9            | 92.0                 | 100%            |                      |
| <i>ZCN8</i> teosinte | 90.9            | 92.0                 | 100%            | 100%                 |
|                      | <i>ZCN7</i> B73 | <i>ZCN7</i> teosinte | <i>ZCN8</i> B73 | <i>ZCN8</i> teosinte |



**Supplemental Table S3.** Analysis of the mC profile of *ZCN7* and *ZCN8* by bisulfite sequencing. Percent mC for the upper strand is reported as an average ( $\pm$ SD) from 10 independent clones for each locus region and each treatment/developmental stage analyzed. The treatments are: wild-type (wt) and *idl* mutant for B73 inbred line and SD and NB condition for teosinte plants. The developmental stages are: immature leaf (IL) and mature leaf (ML). The mC is divided in subcategories CG, CHG, or CHH (H = A or T or C) and summed (total). The number of occurrences of each cytosine in a given context and in the sequenced region, for the total of the clones, is reported (n). No statistically significant differences (t test,  $p < 0.01$ ) between wt vs *idl* and between SD vs NB for all locus regions analyzed was found.

| Locus (region)                      | Treatment / Dev. Stage | % Methylation (n) |                 |       |                 |        |               |        |                |
|-------------------------------------|------------------------|-------------------|-----------------|-------|-----------------|--------|---------------|--------|----------------|
|                                     |                        | CG                | CHG             | CHH   | Total           |        |               |        |                |
| <b>ZCN7 B73</b><br>(5'-end)         | wt IL                  | n=90              | 87.0 $\pm$ 9.0  | n=180 | 1.1 $\pm$ 1.3   | n=620  | 0.3 $\pm$ 0.7 | n=890  | 9.2 $\pm$ 1.3  |
|                                     | <i>idl</i> IL          |                   | 87.0 $\pm$ 5.0  |       | 1.7 $\pm$ 3.7   |        | 0.5 $\pm$ 1.1 |        | 9.4 $\pm$ 1.2  |
| <b>ZCN7 B73</b><br>(gene body)      | wt IL                  | n=100             | 96.0 $\pm$ 7.0  | n=260 | 21.0 $\pm$ 34.0 | n=1010 | 2.0 $\pm$ 0.8 | n=1370 | 12.0 $\pm$ 6.0 |
|                                     | <i>idl</i> IL          |                   | 92.0 $\pm$ 10.0 |       | 21.0 $\pm$ 35.0 |        | 1.3 $\pm$ 2.0 |        | 11.0 $\pm$ 8.0 |
| <b>ZCN7 B73</b><br>(3'-end)         | wt IL                  | n=60              | 92.0 $\pm$ 9.0  | n=220 | 14.0 $\pm$ 21.0 | n=720  | 2.1 $\pm$ 2.6 | n=1000 | 10.0 $\pm$ 5.4 |
|                                     | <i>idl</i> IL          |                   | 93.0 $\pm$ 9.0  |       | 15.0 $\pm$ 30.0 |        | 2.1 $\pm$ 2.3 |        | 11.0 $\pm$ 6.5 |
| <b>ZCN8 B73</b><br>(5'-end)         | wt ML                  | n=60              | 88.0 $\pm$ 16.0 | n=220 | 0.5 $\pm$ 1.4   | n=760  | 0.3 $\pm$ 0.6 | n=1040 | 5.4 $\pm$ 1.2  |
|                                     | <i>idl</i> ML          |                   | 88.0 $\pm$ 11.0 |       | 0.5 $\pm$ 1.4   |        | 0.1 $\pm$ 0.4 |        | 5.3 $\pm$ 0.8  |
|                                     | wt IL                  |                   | 83.0 $\pm$ 18.0 |       | 0.0 $\pm$ 0.0   |        | 0.4 $\pm$ 0.6 |        | 5.1 $\pm$ 1.1  |
|                                     | <i>idl</i> IL          |                   | 80.0 $\pm$ 20.0 | n=220 | 0.0 $\pm$ 0.0   |        | 0.0 $\pm$ 0.0 |        | 4.6 $\pm$ 1.2  |
| <b>ZCN8 B73</b><br>(gene body)      | wt IL                  | n=70              | 87.0 $\pm$ 9.0  | n=100 | 1.1 $\pm$ 1.3   | n=530  | 0.3 $\pm$ 0.7 | n=700  | 9.2 $\pm$ 1.3  |
|                                     | <i>idl</i> IL          |                   | 87.0 $\pm$ 5.0  |       | 1.7 $\pm$ 3.7   |        | 0.5 $\pm$ 1.1 |        | 9.3 $\pm$ 2.3  |
| <b>ZCN8 B73</b><br>(3'-end)         | wt IL                  | n=70              | 91.0 $\pm$ 14.0 | n=270 | 9.0 $\pm$ 14.0  | n=720  | 2.1 $\pm$ 1.9 | n=1060 | 9.6 $\pm$ 3.7  |
|                                     | <i>idl</i> IL          |                   | 91.0 $\pm$ 15.0 |       | 5.0 $\pm$ 8.4   |        | 1.4 $\pm$ 1.6 |        | 8.3 $\pm$ 1.9  |
| <b>ZCN7 teosinte</b><br>(5'-end)    | SD IL                  | n=90              | 84.0 $\pm$ 20.0 | n=180 | 1.1 $\pm$ 2.3   | n=600  | 0.5 $\pm$ 1.1 | n=870  | 9.3 $\pm$ 2.4  |
|                                     | NB IL                  |                   | 86.0 $\pm$ 9.0  |       | 1.7 $\pm$ 2.7   |        | 0.2 $\pm$ 0.5 |        | 9.3 $\pm$ 1.1  |
| <b>ZCN7 teosinte</b><br>(gene body) | SD IL                  | n=100             | 97.0 $\pm$ 5.0  | n=270 | 14.0 $\pm$ 28.0 | n=1040 | 2.1 $\pm$ 1.6 | n=1410 | 11.0 $\pm$ 6.0 |
|                                     | NB IL                  |                   | 96.0 $\pm$ 7.0  |       | 15.0 $\pm$ 29.0 |        | 2.5 $\pm$ 1.8 |        | 12.0 $\pm$ 7.0 |
| <b>ZCN7 teosinte</b><br>(3'-end)    | SD IL                  | n=60              | 93.0 $\pm$ 9.0  | n=210 | 12.0 $\pm$ 19.0 | n=750  | 2.2 $\pm$ 2.2 | n=1020 | 10.0 $\pm$ 4.4 |
|                                     | NB IL                  |                   | 92.0 $\pm$ 12.0 |       | 13.0 $\pm$ 21.0 |        | 3.3 $\pm$ 2.6 |        | 11.0 $\pm$ 4.8 |
| <b>ZCN8 teosinte</b><br>(5'-end)    | SD ML                  | n=60              | 85.0 $\pm$ 12.0 | n=220 | 1.4 $\pm$ 3.1   | n=760  | 0.1 $\pm$ 0.4 | n=1040 | 5.3 $\pm$ 0.9  |
|                                     | NB ML                  |                   | 83.0 $\pm$ 19.0 |       | 0.9 $\pm$ 1.9   |        | 0.3 $\pm$ 0.6 |        | 5.2 $\pm$ 1.3  |
|                                     | SD IL                  |                   | 78.0 $\pm$ 11.0 |       | 0.5 $\pm$ 1.4   |        | 0.4 $\pm$ 0.6 |        | 4.9 $\pm$ 0.8  |
|                                     | NB IL                  |                   | 82.0 $\pm$ 12.0 |       | 0.9 $\pm$ 1.9   |        | 0.3 $\pm$ 0.6 |        | 5.1 $\pm$ 0.9  |
| <b>ZCN8 teosinte</b><br>(gene body) | SD IL                  | n=60              | 95.0 $\pm$ 8.0  | n=110 | 2.7 $\pm$ 4.3   | n=520  | 1.0 $\pm$ 1.3 | n=690  | 9.4 $\pm$ 1.2  |
|                                     | NB IL                  |                   | 95.0 $\pm$ 8.0  |       | 1.8 $\pm$ 3.8   |        | 0.6 $\pm$ 0.9 |        | 9.0 $\pm$ 1.3  |
| <b>ZCN8 teosinte</b><br>(3'-end)    | SD IL                  | n=80              | 94.0 $\pm$ 12.0 | n=260 | 5.8 $\pm$ 12.0  | n=720  | 1.9 $\pm$ 1.5 | n=1060 | 9.8 $\pm$ 3.9  |
|                                     | NB IL                  |                   | 94.0 $\pm$ 9.0  |       | 8.8 $\pm$ 14.0  |        | 2.0 $\pm$ 1.3 |        | 10.7 $\pm$ 4.3 |

**Supplemental Table S4.** List of primers used for B73 and teosinte cDNA synthesis in strand-specific reverse transcription. a: Orientation of the RNA strand used as template for cDNA synthesis. b: Primer sequences are indicated in 5'-3' orientation.

| <b>Primer name</b>                | <b>RNA strand<sup>a</sup></b> | <b>Primer sequence<sup>b</sup></b> |
|-----------------------------------|-------------------------------|------------------------------------|
| <b>GAPC2rev</b>                   | sense                         | TTCATGTGGCGGATCAGGTCGA             |
| <b>EF-1<math>\alpha</math>rev</b> | sense                         | CAGAGATTGGAACGAAGTGG               |
| <b>ZCN7for</b>                    | antisense                     | GTTAAAAAATCATGCTTTGACAAAG          |
| <b>ZCN7rev</b>                    | sense                         | ATTATTGATGATAATTATATAGTGTAG        |
| <b>ZCN8for</b>                    | antisense                     | GCAACGGCCAATACCATTAG               |
| <b>ZCN8rev</b>                    | sense                         | ATTATTGATGATATTCTATAGTGTGA         |

**Supplemental Table S5.** List of primers used in PCR. a: The amplified regions are indicated using the description employed in the text and Figures. b: Forward (F) and reverse (R) primers used in this study are indicated in 5'-3' orientation.

| <b>Sequence and amplified region <sup>a</sup></b>                                                             | <b>Experiment</b>                                                                                                                                                                                                                                                                                                                                                 | <b>Primer combinations <sup>b</sup></b>                                       |
|---------------------------------------------------------------------------------------------------------------|-------------------------------------------------------------------------------------------------------------------------------------------------------------------------------------------------------------------------------------------------------------------------------------------------------------------------------------------------------------------|-------------------------------------------------------------------------------|
| <b>ZCN7</b><br>5'-end genomic region                                                                          | cloning of teosinte ZCN7 genomic sequence by PCR                                                                                                                                                                                                                                                                                                                  | <b>F</b> AGTACCCAGCCACCCAGAA<br><b>R</b> TCCTGTAGGACACGAGCCA                  |
| <b>ZCN7</b><br>internal genomic region and unspliced antisense transcript                                     | i) cloning of teosinte ZCN7 genomic sequence by PCR<br><br>ii) cloning of B73 and teosinte ZCN7 antisense transcript by strand-specific RT-PCR with ZCN7for-primed cDNA                                                                                                                                                                                           | <b>F</b> GACAAAGTACGTAAAAAATCATGC<br><b>R</b> AGAGGTGGTGCATTGACATTC           |
| <b>ZCN7</b><br>3'-end genomic region                                                                          | cloning of teosinte ZCN7 genomic sequence by PCR                                                                                                                                                                                                                                                                                                                  | <b>F</b> TGTCAAAGGGAAGGTGGATCG<br><b>R</b> GACGATAGGACGAGGCGTG                |
| <b>ZCN8</b><br>5'-end genomic region                                                                          | cloning of teosinte ZCN7 genomic sequence by PCR                                                                                                                                                                                                                                                                                                                  | <b>F</b> GTACATGTTCAAACAAACCAGGGA<br><b>R</b> CTTAGTGGAAATGGTTGGTGTAAAGG      |
| <b>ZCN8</b><br>internal genomic region, unspliced antisense transcript, and spliced and unspliced transcripts | i) cloning of teosinte ZCN7 genomic sequence by PCR<br><br>ii) cloning of B73 and teosinte ZCN8 antisense transcript by strand-specific RT-PCR with ZCN8for-primed cDNA<br><br>iii) RT-PCR with oligo(dT)-primed cDNA for detection of spliced and unspliced RNAs and cloning of B73 and teosinte ZCN8 sense spliced mRNA ( ZCN8-1 and ZCN7-2 primers in Fig. 3A) | <b>F</b> AAGAGCAACGGCCAATACCATTAGCGA<br><b>R</b> CAGTGGCCTATGGTTTCTACTCTTCCCT |
| <b>ZCN8</b><br>3'-end genomic region                                                                          | cloning of teosinte ZCN8 genomic sequence by PCR                                                                                                                                                                                                                                                                                                                  | <b>F</b> CACGGCAATATCACCTCAGC<br><b>R</b> TGCAGCTAGTATATCAGAACGGTG            |
| <b>ZCN7</b><br>unspliced transcript                                                                           | RT-PCR with oligo(dT)-primed cDNA for detection of unspliced B73 and teosinte RNAs (ZCN7-1a and ZCN7-2 primers in Fig. 3A)                                                                                                                                                                                                                                        | <b>F</b> GACAAAGTACGTAAAAAATCATGC<br><b>R</b> AGAGGTGGTGCATTGACATTC           |

|                                                                                                                                    |                                                                                                                                                                                                |                                                         |
|------------------------------------------------------------------------------------------------------------------------------------|------------------------------------------------------------------------------------------------------------------------------------------------------------------------------------------------|---------------------------------------------------------|
| <b>ZCN7</b><br>spliced and unspliced transcripts                                                                                   | RT-PCR with oligo(dT)-primed cDNA for detection of spliced and unspliced RNAs and cloning of B73 and teosinte ZCN7 sense spliced mRNA (ZCN7-1b and ZCN7-2 primers in Fig. 3A)                  | F CTTCCCTCAGTCCCATAGGGTTA<br>R AGAGGTGGTGCATTGACATTC    |
| <b>ZCN7 and ZCN8</b><br>spliced and unspliced transcripts                                                                          | RT-PCR with cDNA synthesized with locus and strand specific primers for detection of spliced and unspliced ZCN7 and ZCN8 RNAs from B73 and teosinte (ZCN7/8-1 and ZCN7/8-2 primers in Fig. 3B) | F TCATTGGTTATGGCTCGTGT<br>R AGTGATGGATGGCTTGGACTT       |
| <b>ZCN7 and ZCN8</b><br>spliced transcripts                                                                                        | qRT-PCR with oligo(dT)-primed cDNA for detection of spliced transcripts of ZCN7 and ZCN8 (experiments of Supplemental Fig. S2)                                                                 | F ACACCCTGGTACTGATTGACCC<br>R CCAGTGCAAGTACTCCCTTAGTGA  |
| <b>ZCN7</b><br>spliced sense transcript<br>(F primer spanning two exons and specific for spliced form)                             | strand-specific qRT-PCR with ZCN7rev-primed B73 and teosinte cDNA                                                                                                                              | F GGGAGTACTTGCACTGGATGG<br>R CATATAGAGGTGGTGCATTGACA    |
| <b>ZCN7</b><br>unspliced sense and antisense transcript<br>(F and R primers located in the intron and specific for unspliced form) | strand-specific qRT-PCR with ZCN7rev-primed and ZCN7for-primed B73 and teosinte cDNA                                                                                                           | F TTTAATTGGTTGGCAACATCAG<br>R TGTGGGGACATCGACATTTATT    |
| <b>ZCN8</b><br>spliced sense transcript<br>(F primer spanning two exons and specific for spliced form)                             | strand-specific qRT-PCR with ZCN8rev-primed B73 and teosinte cDNA                                                                                                                              | F GGGAGTACTTGCACTGGATGG<br>R TTGACAGTTGAAATATGTAGCGG    |
| <b>ZCN8</b><br>unspliced sense and antisense transcript<br>(F and R primers located in the intron and specific for unspliced form) | strand-specific qRT-PCR with ZCN8rev-primed and ZCN8for-primed B73 and teosinte cDNA                                                                                                           | F TGGTTGGTAACCTTGAGGTGTC<br>R CAAGGAGCACTGAAGTATGTGG    |
| <b>ZCN7</b><br>A region                                                                                                            | ChIP – MspJI<br>B73 and teosinte                                                                                                                                                               | F ATGCAACAAAGAGAGCACAAAA<br>R TACCTTAGTGTTTGTTCTTCCGC   |
| <b>ZCN7</b><br>B region                                                                                                            | ChIP – MspJI<br>B73 and teosinte                                                                                                                                                               | F GTTAAAAAATCATGCTTTGACAAAG<br>R TGTAGGACACGAGCCATAACC  |
| <b>ZCN7</b><br>C region                                                                                                            | ChIP – MspJI<br>B73 and teosinte                                                                                                                                                               | F GCAATTTACAGATAATGCTACCCGA<br>R CTGCACCAATTCAGTGGTCAAC |
| <b>ZCN7</b><br>D region                                                                                                            | ChIP – MspJI<br>B73 and teosinte                                                                                                                                                               | F TTTAATTGGTTGGCAACATCAG<br>R TGTGGGGACATCGACATTTATT    |
| <b>ZCN7</b><br>E region                                                                                                            | ChIP – MspJI<br>B73 and teosinte                                                                                                                                                               | F GAACAGGATTCAGCGAGCA<br>R GCTCTTTGGCACATACGCT          |

|                                |                                          |                                                                              |
|--------------------------------|------------------------------------------|------------------------------------------------------------------------------|
| <b>ZCN8</b><br>A region        | ChIP – MspJI<br>B73 and teosinte         | <b>F</b> CTCCAGCCATTCCTTCGGT<br><b>R</b> CATACTCAGTGCATGTTCTTCCAA            |
| <b>ZCN8</b><br>B region        | ChIP – MspJI<br>B73 and teosinte         | <b>F</b> GCAACGGCCAATACCATTAG<br><b>R</b> TAGCTCAGCACTTGGCAGA                |
| <b>ZCN8</b><br>C region        | ChIP – MspJI<br>B73 and teosinte         | <b>F</b> TGACATGAGGGCTTTCTACACC<br><b>R</b> CTACAACCTAAGCTCCACAGATAC         |
| <b>ZCN8</b><br>D region        | ChIP – MspJI<br>B73 and teosinte         | <b>F</b> TGGTTGGTAACCTTGAGGTGTC<br><b>R</b> CAAGGAGCACTGAAGTATGTGG           |
| <b>ZCN8</b><br>E region        | ChIP – MspJI<br>B73 and teosinte         | <b>F</b> CGCTCCCACCTCCTAACAAA<br><b>R</b> CGGCGTCCAACCTTACACA                |
| <b>ZCN7</b><br>5'-end region   | Bisulfite sequencing<br>B73 and teosinte | <b>F</b> GTTTTGTATTYYTAYTGTAATTTAT<br><b>R</b> TTCTTTRTCAAARCATRATTTTTTTAAC  |
| <b>ZCN7</b><br>internal region | Bisulfite sequencing<br>B73 and teosinte | <b>F</b> GTTAAAAAATYATGYTTTGAYAAAGAA<br><b>R</b> CCAATATCATAATAARRCAAATTAATA |
| <b>ZCN7</b><br>3'-end region   | Bisulfite sequencing<br>B73 and teosinte | <b>F</b> AAGAGYTAGTATTTTATGAGAGA<br><b>R</b> TTCCATRAAATATACTTTRTATTATCA     |
| <b>ZCN8</b><br>5'-end region   | Bisulfite sequencing<br>B73 and teosinte | <b>F</b> ATGTGGGTTYTYAAYAAGTGAAATA<br><b>R</b> ATATATTRCARAAAAATAACTCRCTAAT  |
| <b>ZCN8</b><br>internal region | Bisulfite sequencing<br>B73 and teosinte | <b>F</b> TAAGAATAAYGTAYAAAYAATAGG<br><b>R</b> AACATATTRCRCTTTTTTTACCA        |
| <b>ZCN8</b><br>3'-end region   | Bisulfite sequencing<br>B73 and teosinte | <b>F</b> AAGAGYTAATATTTTATGAGAGG<br><b>R</b> TTCCATRAAATATACTTTRRATAATTCA    |
